# Supplementary material
Source: MDPI journal article supplement (https://www.mdpi.com/2079-6412/12/2/232)
Supplement: s1 [file s1]

# Supplementary Materials: Mechanically Enhanced Self-Stratified Acrylic/Silicone Antifouling Coatings

Jingjing Xue <sup>1</sup>, Li Wang <sup>1</sup>, Yong Fan <sup>1,\*</sup>, Jianing Xu <sup>1</sup>, Jie Zhao <sup>2</sup>, Limei Tian <sup>2</sup> and Wenbo Du <sup>3,\*</sup>

<sup>1</sup> College of Chemistry, Jilin University, Changchun 130022, China; xuejj19@mails.jlu.edu.cn (Jingjing Xue); lwang99@jlu.edu.cn (L.W.); xujn@jlu.edu.cn (Jianing Xu)

<sup>2</sup> Key Laboratory of Bionic Engineering (Ministry of Education), Jilin University, Changchun 130022, China; jiezhao@jlu.edu.cn (J.Z.); lmtian@jlu.edu.cn (L.T.)

<sup>3</sup> National Key Laboratory for Remanufacturing, Army Academy of Armored Forces, Beijing 100072, China

\* Correspondence: mrfy@jlu.edu.cn (Y.F.); dwbneu@163.com (W.D.)

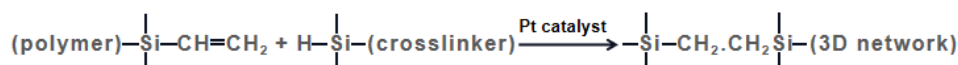

**Figure S1.** Hydrosilylation reaction for the preparation of silicone elastomers.

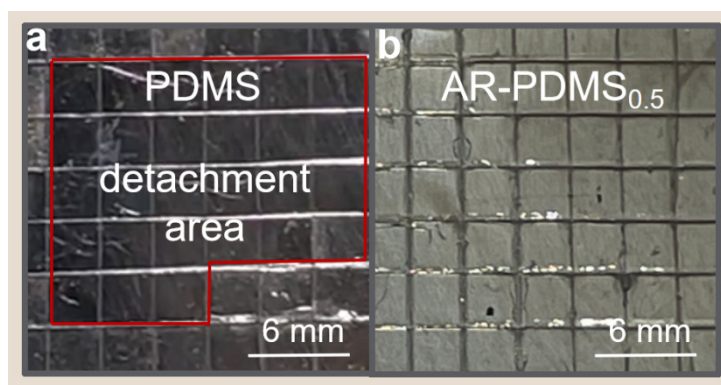

**Figure S2.** Cross-cut tape test results of (a) PDMS and (b) AR-PDMS<sub>0.5</sub>.

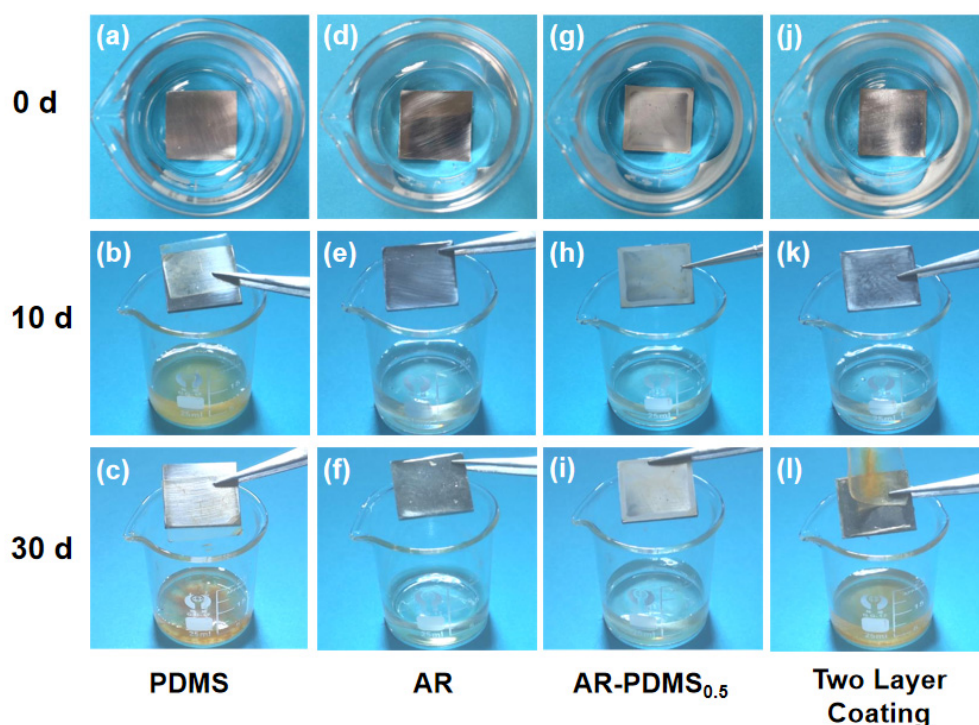

**Citation:** Xue, J.; Wang, L.; Fan, Y.; Xu, J.; Zhao, J.; Tian, L.; Du, W.

Mechanically Enhanced Self-Stratified Acrylic/Silicone Antifouling Coatings. *Coatings* **2022**, *12*, 232. <https://doi.org/10.3390/coatings12020232>.

Academic Editor: Esther Rebollar

Received: 28 December 2021

Accepted: 7 February 2022

Published: 11 February 2022

**Publisher's Note:** MDPI stays neutral with regard to jurisdictional claims in published maps and institutional affiliations.

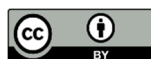

**Copyright:** © 2022 by the authors. Licensee MDPI, Basel, Switzerland. This article is an open access article distributed under the terms and conditions of the Creative Commons Attribution (CC BY) license (<http://creativecommons.org/licenses/by/4.0/>).

Figure S3. Photographic images of AR-PDMS<sub>0.5</sub> coatings after immersion in ASW for 0, 10, and 30 d.

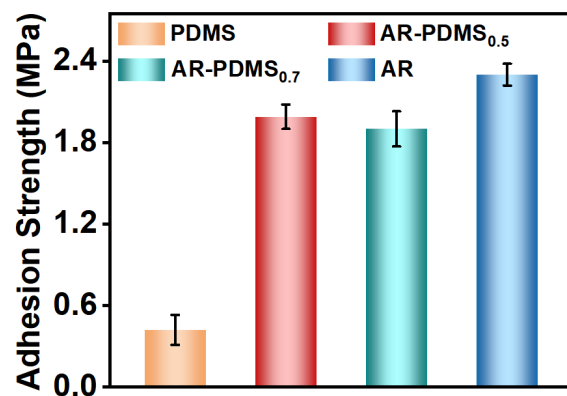

Figure S4. The adhesion strength of AR-PDMS<sub>x</sub> coatings to the glass substrate.

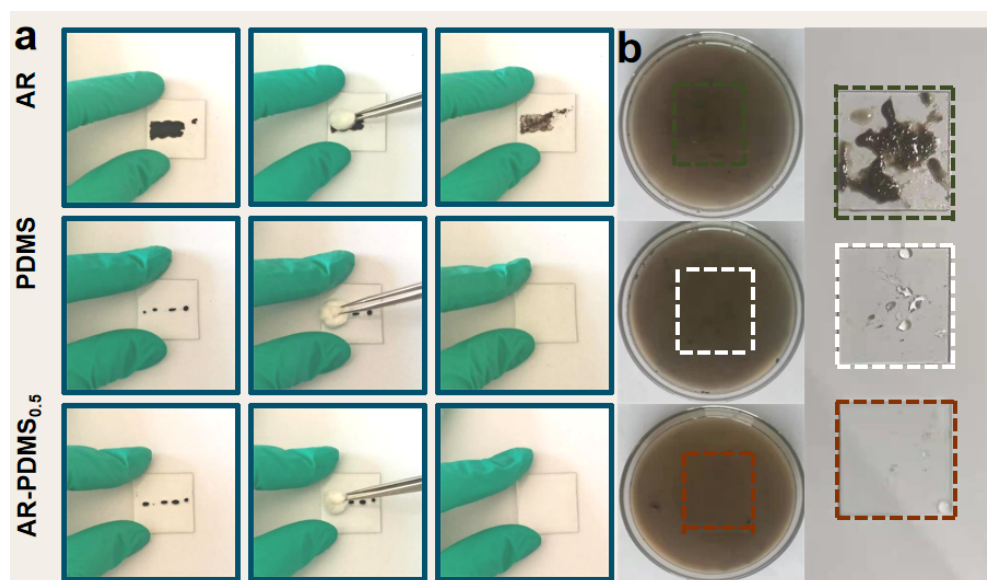

Figure S5. Photographs of a series of antifouling tests (a) an oil-based permanent ink marker on the sample coatings. (b) exposing in an aqueous suspension of sludge for 12 h.
